# Supplementary material for: Evidence of thermal ionization induced luminescence quenching in CePO4 and GdPO4
Source: Royal Society of Chemistry journal article supplement (doi:10.1039/d2ma00951j), 2022-11-08
Supplement: d2ma00951j1.pdf [file d2ma00951j1.pdf]

**Evidences of thermal ionization induced luminescence quenching in CePO<sub>4</sub>  
and GdPO<sub>4</sub><sup>†</sup>  
(Supplementary information)**

Suchinder K. Sharma,<sup>\*a</sup>

<sup>a</sup> *Amity School of Physical Sciences, Amity University Punjab, Sector-82A, Mohali, 140308, India*

\*E.Mail:suchindersharma@gmail.com

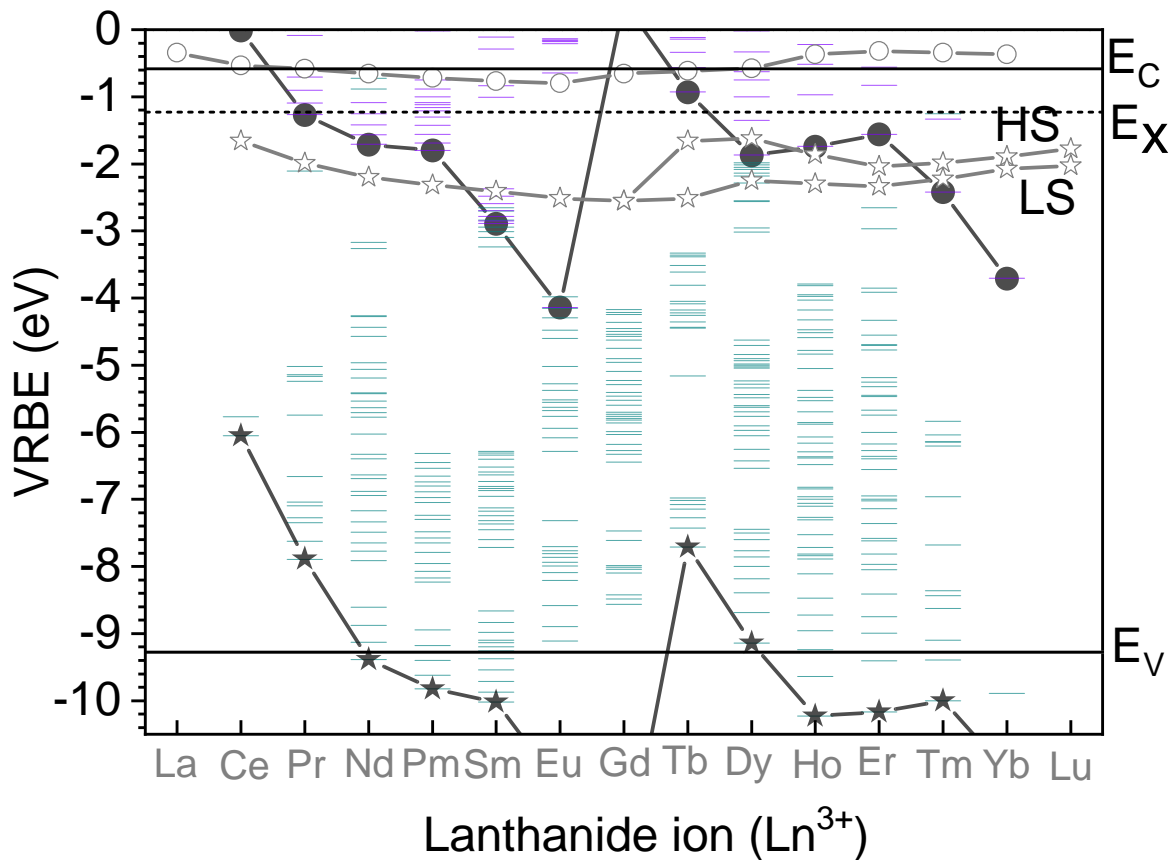

**Fig. S1** VRBE diagram of electronic structure of lanthanide ions in the divalent, and trivalent state of LaPO<sub>4</sub> host. The connected black line indicates the ground state (4f) for all lanthanides in their +3 state (connecting filled star symbol), whereas the connected dark black circles (connecting filled circles), represents the ground state for all lanthanides in their +2 state. The connected light gray line (connecting empty stars) and light gray lines (connecting empty circles) represent the lowest 5d states for all lanthanides in their +3 and +2 state, respectively. The top of the valence band (E<sub>V</sub>), the electron binding energy in the exciton state (E<sub>x</sub>), and the bottom of the CB (E<sub>C</sub>), as well as the high-spin (HS) and low-spin (LS) states, are also indicated. The HS and LS states represent spin-forbidden and spin-allowed transitions, respectively.

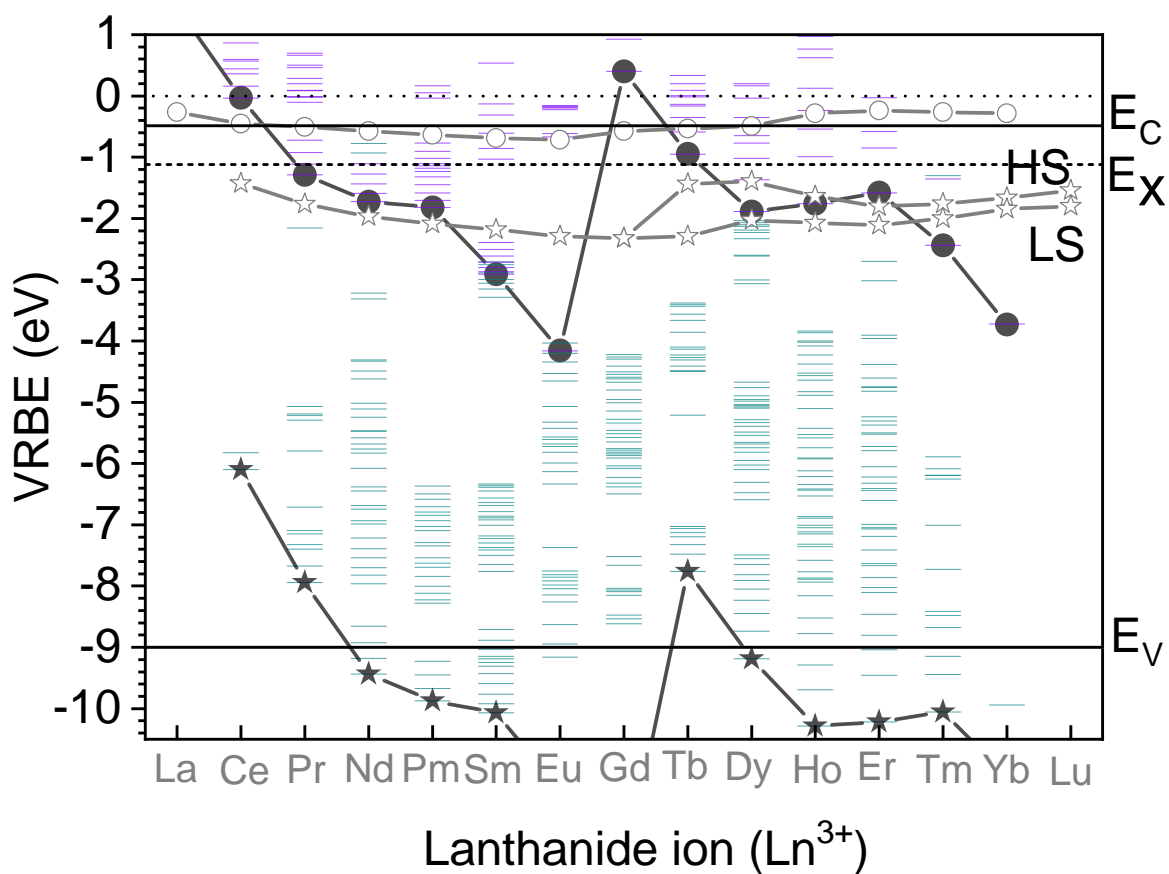

**Fig. S2** VRBE diagram of electronic structure of lanthanide ions in the divalent, and trivalent state of  $\text{GdPO}_4$  host. The connected black line indicates the ground state ( $4f$ ) for all lanthanides in their  $+3$  state (connecting filled star symbol), whereas the connected dark black circles (connecting filled circles), represents the ground state for all lanthanides in their  $+2$  state. The connected light gray line (connecting empty stars) and light gray lines (connecting empty circles) represent the lowest 5d states for all lanthanides in their  $+3$  and  $+2$  state, respectively. The top of the valence band ( $E_V$ ), the electron binding energy in the exciton state ( $E_X$ ), and the bottom of the CB ( $E_C$ ), as well as the high-spin (HS) and low-spin (LS) states, are also indicated. The HS and LS states represent spin-forbidden and spin-allowed transitions, respectively.

**Table S1** The comparison of structural parameters for the two samples.

| Parameters                    | Sample             |                    |
|-------------------------------|--------------------|--------------------|
|                               | CePO <sub>4</sub>  | GdPO <sub>4</sub>  |
| a (Å)                         | 6.777(3)           | 6.621(2)           |
| b                             | 6.993(3)           | 6.823(2)           |
| c                             | 6.445(3)           | 6.310(2)           |
| $\beta$ (Degree)              | 103.54(4)          | 104.16(2)          |
| V(Å <sup>3</sup> )            | 296.97 (3)         | 276.4(4)           |
| Space group                   | P2 <sub>1</sub> /n | P2 <sub>1</sub> /n |
| Crystal structure             | Monoclinic         | Monoclinic         |
| Density (Mg m <sup>-3</sup> ) | 5.26               | 6.061              |
